# Supplementary material for: Association between CYP3A5 Polymorphism and Statin-Induced Adverse Events: A Systemic Review and Meta-Analysis
Source: MDPI journal article supplement (doi:10.3390/jpm11070677), 2021-07-19
Supplement: s1 [file s1]

(a)

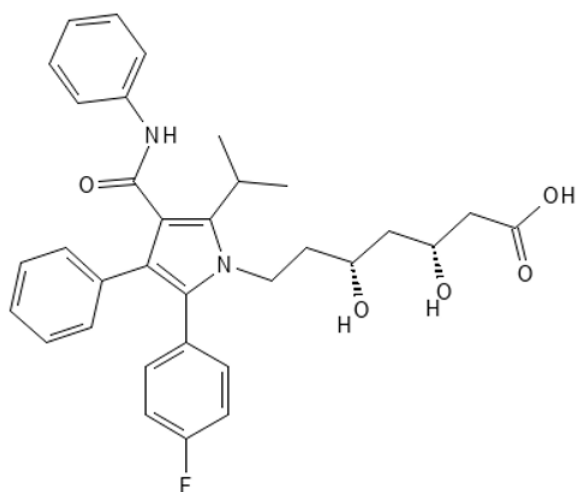

(b)

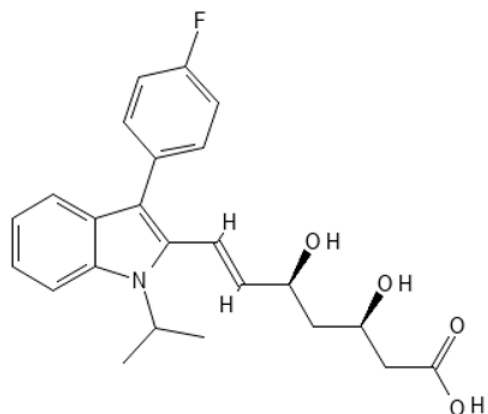

(c)

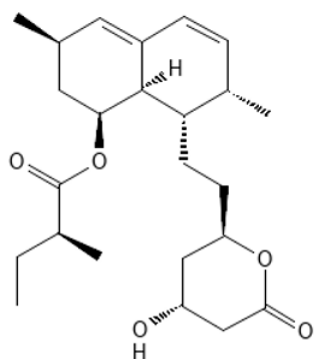

(d)

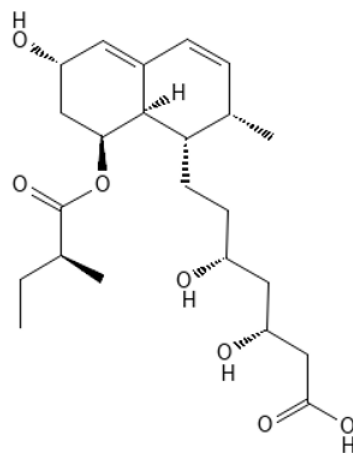

(e)

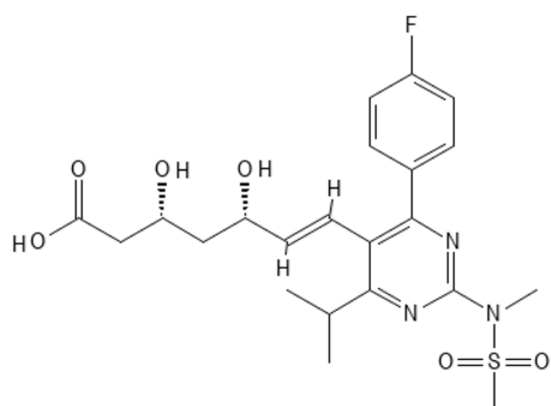

(f)

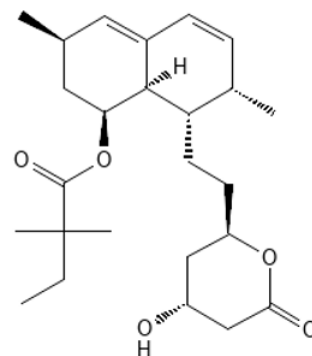

**Supplementary Figure S1.** Chemical structures of statins. The chemical structure for each drug was drawn with the PubChem Sketcher V2.4. (a) Atorvastatin. (b) Fluvastatin. (c) Lovastatin. (d) Pravastatin. (e) Rosuvastatin. (f) Simvastatin.

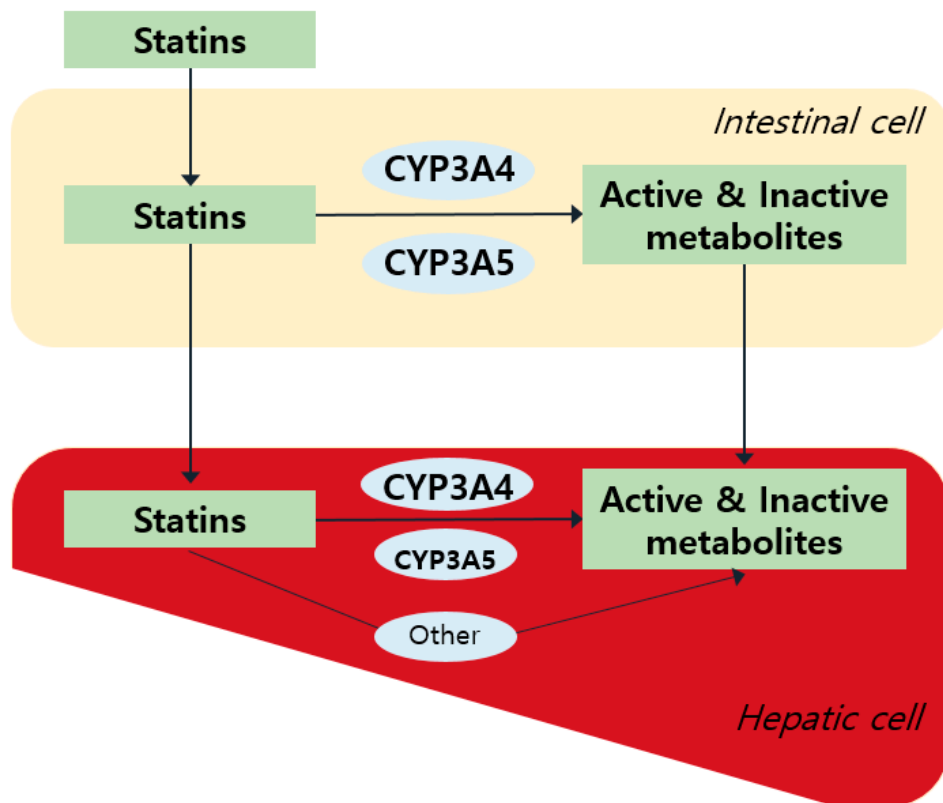

**Supplementary Figure S2.** CYP3A4/5 metabolic pathways of statins.

(a)

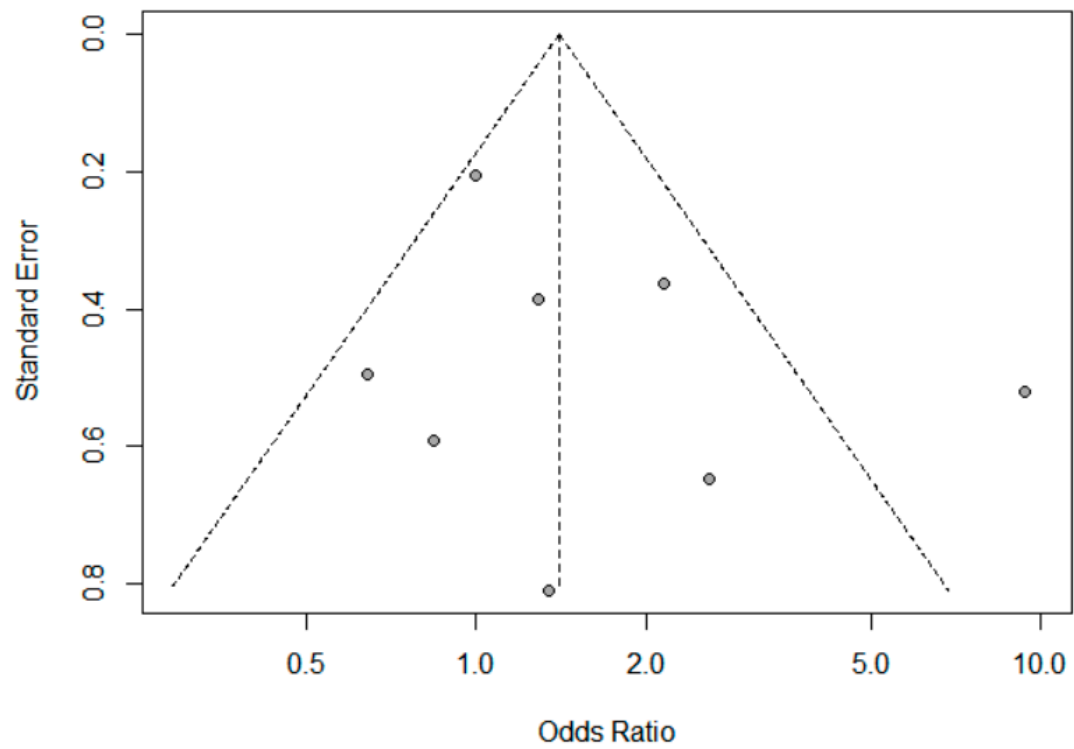

(b)

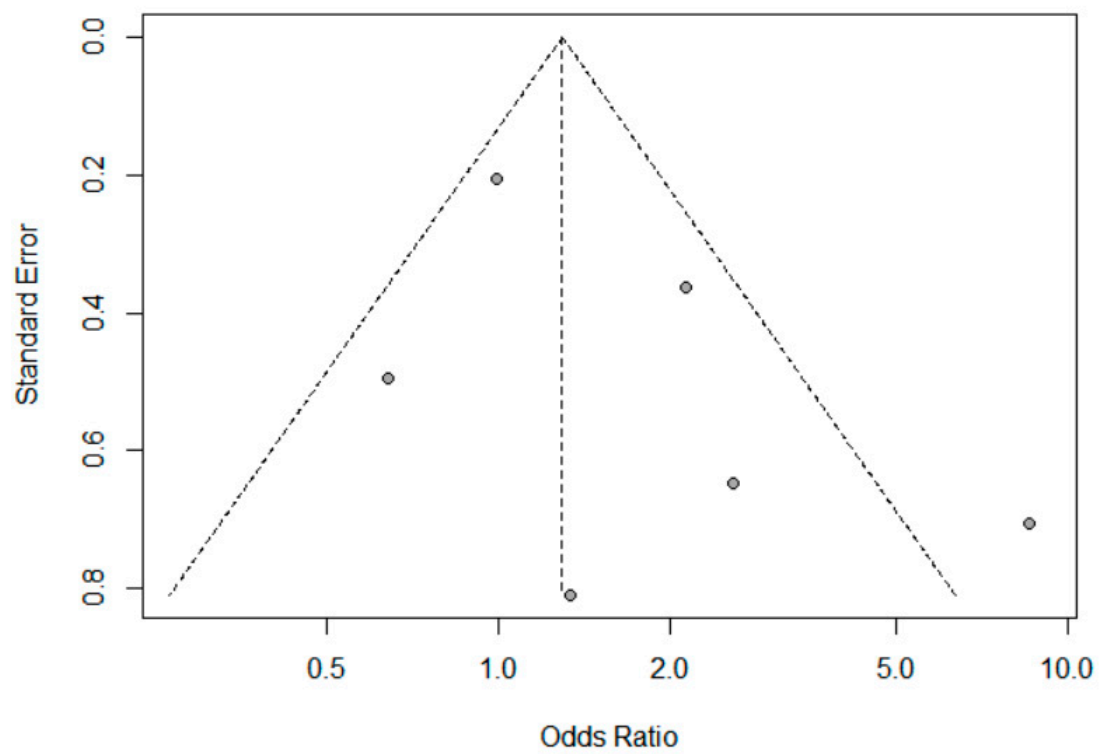

**Supplementary Figure S3.** Funnel plot of the association between *CYP3A5*\*3 and statin-induced adverse events. (a) Statin adverse events. (b) Statin-induced myopathy
